# Supplementary material for: Impacts of Bush Encroachment on Wildlife Species Diversity, Composition, and Habitat Preference in Ol Pejeta Conservancy, Laikipia, Kenya
Source: Hindawi journal article supplement (doi:10.1155/2017/5620125), 2017-01-01
Supplement: f1 [file 5620125.f1.docx]

Supplementary Material

Table 1. showing wildlife species detection or non-detection across the various habitat cover types

| **Species**  **(Common Name)** | **Scientific Names** | **Habitat Types In OPC** | | | |
| --- | --- | --- | --- | --- | --- |
| ***Acacia drepanolobium*** | ***Euclea divinorum*** | **mixed bushland** | **Open grassland** |
| Aardvark | *Orycteropus afer* | 1 | 0 | 1 | 1 |
| Baboon | *Olive Baboon* | 1 | 1 | 1 | 1 |
| Black Backed Jackal | *Canis mesomelas* | 1 | 1 | 1 | 1 |
| Black Rhino | *Diceros bicornis* | 1 | 1 | 1 | 1 |
| Buffalo | *Syncerus caffer* | 1 | 1 | 1 | 1 |
| Bush Duiker | *Sylvicapra grimmia abyssinicus* | 1 | 1 | 0 | 0 |
| Eland | *Taurotragus oryx* | 1 | 1 | 1 | 1 |
| Elephant | *Loxodonta africana* | 1 | 1 | 1 | 1 |
| Genet (**)* | *Genetta tigrina* | 1 *(*)* | 0 | 0 | 0 |
| Giraffe | *Giraffa reticulata* | 1 | 1 | 1 | 1 |
| Grants Gazelle | *Nanger granti* | 1 | 0 | 0 | 1 |
| Hare | *Lepus victoriae* | 1 | 0 | 0 | 1 |
| Hartebeest *(*)* | *Alcelaphus buselaphus* | 0 | 0 | 0 | 1*(*)* |
| Impala | *Aepyceros melampus* | 1 | 1 | 1 | 1 |
| Leopard (**)* | *Panthera pardus* | 0 | 1 *(*)* | 0 | 0 |
| Lion | *Panthera leo* | 1 | 1 | 0 | 1 |
| Dwarf Mongoose (**)* | *Helogale parvula* | 0 | 0 | 0 | 1 *(*)* |
| Plains Zebra | *Equus quagga* | 1 | 1 | 1 | 1 |
| Serval Cat (**)* | *Leptailurus serval* | 1 *(*)* | 0 | 0 | 0 |
| Spotted Hyena | *Crocuta crocuta* | 1 | 1 | 1 | 1 |
| Steenbok | *Raphicerus campestris* | 1 | 1 | 0 | 0 |
| Striped Hyena | *Hyaena hyaena* | 1 | 1 | 0 | 1 |
| Suni | *Neotragus moschatus* | 0 | 0 | 1 | 0 |
| Thompsons Gazelle (**)* | *Eudorcas thomsonii* | 0 | 0 | 0 | 1 *(*)* |
| Warthog | *Phacochoerus africanus* | 1 | 1 | 1 | 1 |
| Waterbuck | *Kobus ellipsiprymnus* | 1 | 1 | 1 | 1 |
| White-Rhino | *Ceratotherium simum* | 0 | 1 | 0 | 0 |
| White-tailed Mongoose | *Ichneumia albicauda* | 1 | 0 | 1 | 1 |
| Wildcat (**)* | *Felis silvestris* | 0 | 1 *(*)* | 0 | 0 |
| Zorilla (**)* | *Ictonyx striatus* | 1 *(*)* | 0 | 0 | 0 |

Key: **1** denotes ***detection*** while **0** denotes ***non-detection***

***** Denotes ***detection*** in only one habitat type(s)
